# Supplementary material for: Citrate shows protective effects on cardiovascular and renal function in ischemia-induced acute kidney injury
Source: Springer Nature journal article supplement (doi:10.1186/s12882-017-0546-1), 2017-04-10

**A**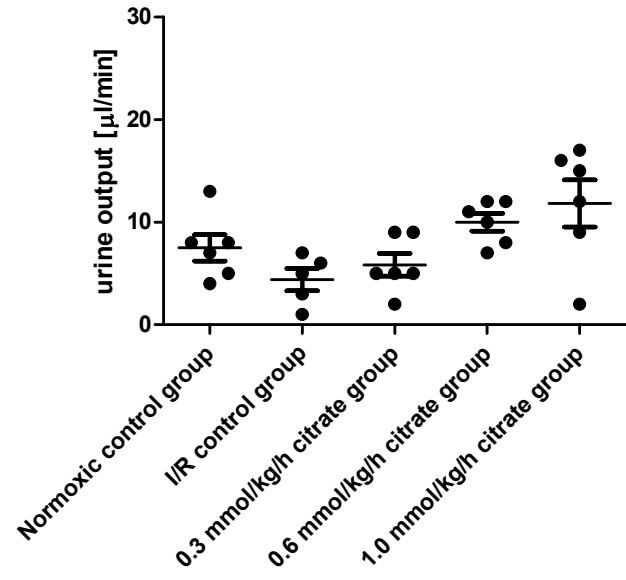**B**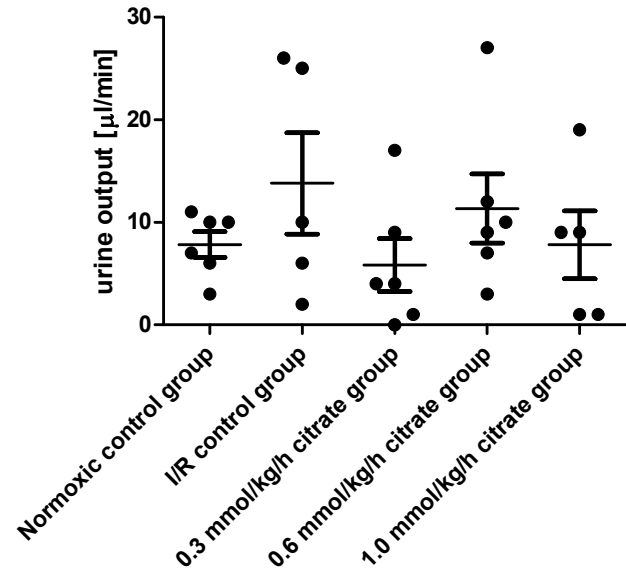

Supplement: MOESM2 [file 12212958]
